# Supplementary material for: Approaching an adjustable organic thermochromic luminophore library via the synergistic effects between structure-related molecular dynamics and aggregation-related luminescence
Source: Royal Society of Chemistry journal article supplement (doi:10.1039/d0tc01755h), 2020-01-01
Supplement: d0tc01755h4.pdf [file d0tc01755h4.pdf]

**Supplementary Movie 1.** Twelfth-level data encryption and decryption during the thermal cycles under a UV lamp.

**Supplementary Movie 2.** Anticounterfeiting applications on zip-pop can during heating by hairdryer under a UV lamp.
